# Supplementary material for: Realizing CO2 emission reduction in lime and soda ash manufacturing through anion exchange
Source: Royal Society of Chemistry journal article supplement (doi:10.1039/d4gc05568c), 2025-01-01
Supplement: d4gc05568c1.pdf [file d4gc05568c1.pdf]

# Realizing CO<sub>2</sub> Emissions Reduction in Lime and Soda Ash Manufacturing through Anion Exchange

Aniruddha Baral<sup>1,2\*</sup>, Jose-Luis Galvez,<sup>3\*</sup> Theodore Hanein<sup>1,4\*</sup>

<sup>1</sup> School of Civil Engineering, University of Leeds, Leeds, LS2 9LG, UK

<sup>2</sup> Department of Civil, Architectural and Environmental Engineering, University of Texas at Austin, Austin, TX 78712, USA

<sup>3</sup> Tecnalia Research & Innovation, Astondo Bidea, Edificio 700, 48160, Derio, Bizkaia, Spain

<sup>4</sup> Earth4Earth Technology Limited, London, W1W 7LT, UK

\* Corresponding authors: [aniruddha.baral@austin.utexas.edu](mailto:aniruddha.baral@austin.utexas.edu), [joseluis.galvez@tecnalia.com](mailto:joseluis.galvez@tecnalia.com), [t.hanein@leeds.ac.uk](mailto:t.hanein@leeds.ac.uk)

## Supplementary Information

### Contents

|                                                                |    |
|----------------------------------------------------------------|----|
| 1. Assumptions around Sodium Hydroxide .....                   | 2  |
| 2. Sodium Carbonate.....                                       | 3  |
| 3. Recycling sodium carbonate back into sodium hydroxide ..... | 4  |
| 4. Calculating Equipment Cost .....                            | 5  |
| 5. Supplementary Figures .....                                 | 7  |
| 6. References.....                                             | 12 |

## 1. Assumptions around Sodium Hydroxide

As one could expect, the use of sodium hydroxide is the main source of GHG emissions in the evaluation of the carbon footprint of the process. The main reason for that is the relatively high energy intensity of the NaOH production process. The chlor-alkali process uses a brine of NaCl, obtained from seawater, to produce NaOH, Cl<sub>2</sub> and H<sub>2</sub> through electrolysis. The consumption of electricity in the process depends on the type of cell design used. The main types in the chlor-alkali industry are membrane cell, diaphragm cell or mercury cell, being this last one obsolete and discarded for our calculations. As per many multiproduct systems in the industry, the impact derived from the electrolytic manufacturing is usually allocated among the main products: sodium hydroxide, chlorine, and hydrogen. An economic allocation,<sup>1</sup> i.e., allocation of impact per economic flows of the process, instead of mass allocation seems appropriate in this case due to the presence of the lightweight but valuable hydrogen by-product. Energy allocation is not possible either, since NaOH and Cl<sub>2</sub> are not energy products. Only membrane chlor-alkali processes were considered in the calculations, since it is the main technology used by the industry: up to 85% of the current chlor-alkali plants use membrane cells.<sup>2</sup> In any case, the process is extremely dependent on the impact associated to the electricity fed to the cell. Consequently, two main sources of NaOH were considered:

- *Commercial NaOH*, which is the alkali produced under current supply schemes. This would imply that the carbon intensity of electricity used in the electrolytic cell is the current European average emissions from the grid. For membrane cell-based manufacturing, the carbon footprint of sodium hydroxide is around 0.78 kg CO<sub>2</sub>eq per kg, allocating 1.31 kWh of electricity at 0.386 kg CO<sub>2</sub>eq per kWh for the European average. These emissions correspond to 65% of the total emissions associated to sodium hydroxide production (data from ecoinvent).<sup>3</sup>
- *Renewable NaOH*. This is the alkali produced under hypothetical future energy schemes, in which the source of electricity can be considered 100% renewable. This assumption is in line with future energy market prospects; in Europe, more than 50% of electricity would be produced from renewable sources by year 2030, and more than 90%-95% by year 2050.<sup>4</sup>

The chart in Figure S1 shows the evolution of the carbon footprint of sodium hydroxide over recent periods according to the evolution of the average GHG emissions associated to electricity generation in Europe. The use of 100% renewable energy (wind in this case) allows a further reduction down to 0.313 kgCO<sub>2</sub> per kg of sodium hydroxide.

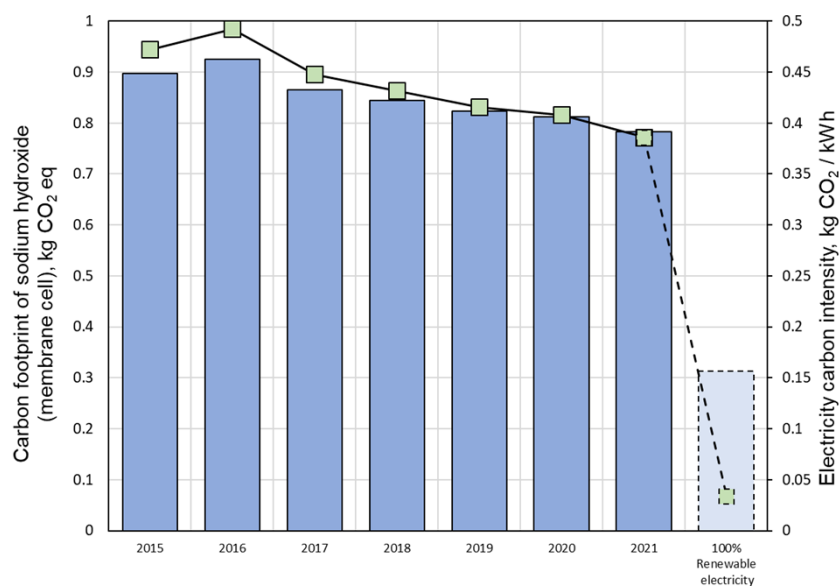

**Figure S1:** Evolution of the carbon footprint of sodium hydroxide produced in membrane electrolytic cells (bars, left y-axis) and carbon intensity of electricity generation electricity (green dots, right y-axis)

## 2. Sodium Carbonate

Sodium carbonate that is produced by the process after the reaction can be a substitute of commercially available sodium carbonate. This is a common approach in LCA, as the system would be expanded to include the “substituted” production process and an avoidance of emissions would then be allocated to the process, i.e. the avoided emissions are subtracted from the carbon footprint. The substituted source of sodium carbonate is commercial soda ash produced by the modified Solvay process, which would account for 0.306 kg CO<sub>2</sub>eq per kg of Na<sub>2</sub>CO<sub>3</sub>·7H<sub>2</sub>O (or 0.671 kg CO<sub>2</sub>eq per kg of pure Na<sub>2</sub>CO<sub>3</sub>), produced as an avoided burden. In our case, the recommendation of ISO 14040<sup>3</sup> was applied, i.e. the system was expanded applying substitution of co-products, as our main interest lies on the maximum potential of emissions reduction and not on product-specific footprint.

The LCA method is, in any case, attributional from the life cycle perspective. This means that the changes introduced in the process are marginal to the economic system and that the process would not significantly produce significant changes in the background system. So, all technosphere flows can be attributed to an impact on global warming measured as a carbon footprint. This approach was considered appropriate since the technology is still in a very early development stage.

### 3. Recycling sodium carbonate back into sodium hydroxide

Sodium carbonate recycling into sodium hydroxide can be driven thermally, through its direct customization, as in the direct air capture approach of Carbon Engineering,<sup>5</sup> or through an electrolytic process,<sup>6</sup> which was proposed in 1993 to decouple sodium hydroxide and chlorine markets. Due to the interest in driving a cleaner process, we opt to model the electrolytic approach, as it is easily integrated with renewable energy sources or, as for sodium hydroxide, the cleaner electricity market can drive lower emissions in future applications.

Process inventories for sodium hydroxide and the “substituted” commercial sodium carbonate were taken fromecoinvent, while the electrolytic regeneration of sodium hydroxide from sodium carbonate was modelled in a previous publication.<sup>7</sup> The mass and energy balance per tonne of sodium carbonate fed to the electrolytic cell is shown in **Table S1**.

**Table S1:** Inputs and outputs for the electrolytic regeneration of solid NaOH from Na<sub>2</sub>CO<sub>3</sub>

| Inputs                                 | Outputs                                              |
|----------------------------------------|------------------------------------------------------|
| Na <sub>2</sub> CO <sub>3</sub> : 1 kg | 1.28 kg of 50% w/w NaOH solution                     |
| Water: 8.1 L                           | 0.25 – 0.35 kg CO <sub>2</sub> (150 bar, to storage) |
| Electricity: 0.59 kWh                  | 4.5 L wastewater                                     |
| Heat:                                  |                                                      |
| 8.7 MJ (solid NaOH)                    |                                                      |
| 4.3 MJ (50% NaOH)                      |                                                      |

Recent developments for direct air capture coupled to the electrolytic regeneration of sodium hydroxide from sodium carbonate shows an experimental potential energy consumption of 374 kJ/mol of captured CO<sub>2</sub> and a ~60% CO<sub>2</sub> capture efficiency,<sup>8</sup> lower than the 85% CO<sub>2</sub> efficiency reported in other studies.<sup>7</sup> This leads to different CO<sub>2</sub> removal potential (0.35 kg CO<sub>2</sub>/kg of Na<sub>2</sub>CO<sub>3</sub> for the highest efficiency, and 0.25 for the lower value). The heat consumption for evaporation of the water content, if solid NaOH is to be produced, can be halved as a concentration of 50% can be used in the anion exchange process.

Assuming a zero burden to CO<sub>2</sub> stored, or, in other words, assuming that all the impact is allocated to the regenerated sodium hydroxide, the impact of the regeneration process is 0.92 kg CO<sub>2</sub> per kg of regenerated sodium hydroxide, or 0.58 kg CO<sub>2</sub> if renewable electricity is assumed.

The cost of this process was calculated assuming \$10/t for transporting and storing CO<sub>2</sub> underground,<sup>9</sup> and an electricity cost of 590 kWh/ton of Na<sub>2</sub>CO<sub>3</sub> and 430 MJ/ton heating from natural gas.

#### 4. Calculating Equipment Cost

The cost of the equipment was calculated using an exponential function as a function of the equipment size.

$$C_e = a + bS^n \quad (1)$$

Where  $C_e$  is the purchased equipment cost on a U.S. dollar basis of 2007 (CEPCI = 509.7),  $a$  and  $b$  are cost constants,  $S$  is the size parameter, and  $n$  is the exponent value. This correlation is valid only between a certain range of size of the equipment,  $S_{\text{Lower}}$  and  $S_{\text{Higher}}$ .

**Table S2:** Constants used in calculating equipment cost.

| Equipment     | Unit of S                | $S_{\text{Lower}}$ | $S_{\text{Higher}}$ | a      | b     | n    |
|---------------|--------------------------|--------------------|---------------------|--------|-------|------|
| Reactor       | Volume, m <sup>3</sup>   | 0.5                | 25                  | 11000  | 76000 | 0.4  |
| Conveyor belt | Length, m                | 10                 | 500                 | 36000  | 640   | 1    |
| Elevator      | Height, m                | 10                 | 30                  | 15000  | 2300  | 1    |
| Pump          | Flow m <sup>3</sup> /h   | 0.2                | 126                 | 6900   | 206   | 1    |
| Pump Driver   | Power, kW                | 1                  | 2500                | -950   | 1770  | 0.6  |
| Dryer         | Area, m <sup>2</sup>     | 11                 | 180                 | 13000  | 9100  | 0.9  |
| Evaporator    | Area, m <sup>2</sup>     | 11                 | 640                 | 280    | 30500 | 0.55 |
| Filter press  | Capacity, m <sup>3</sup> | 0.4                | 1.4                 | 110000 | 77000 | 0.5  |
| Propeller     | Power, kW                | 5                  | 75                  | 15000  | 990   | 1    |
| Tank          | Volume, m <sup>3</sup>   | 10                 | 4000                | 5000   | 1400  | 0.7  |
| Blower        | Flow, m <sup>3</sup> /h  | 200                | 50000               | 3800   | 49    | 0.8  |
| Compressor    | Power, kW                | 93                 | 16800               | 220000 | 2300  | 0.75 |

**Table S3:** Yearly Producer Price Indices for Europe and U.S., Chemical Engineering Plant Cost Index, and exchange rates USD/EUR

| Year | PPI Cement (US) | PPI Industry (Europe) | USD/EUR | CEPCI |
|------|-----------------|-----------------------|---------|-------|
| 2011 | 188.5           |                       | 1.39    | 586   |
| 2012 | 190.6           | 99.8                  | 1.29    | 585   |
| 2013 | 199.3           | 100.6                 | 1.33    | 567   |
| 2014 | 208.1           | 99.8                  | 1.11    | 576   |
| 2015 | 223.4           | 100                   | 1.11    | 557   |
| 2016 | 235.2           | 99.1                  | 1.13    | 542   |
| 2017 | 246             | 99.4                  | 1.18    | 567.5 |
| 2018 | 252.1           | 101.1                 | 1.12    | 603.1 |
| 2019 | 258.1           | 105                   | 1.14    | 607.5 |
| 2020 | 260.7           | 107.5                 | 1.18    | 596.5 |
| 2021 | 271             | 110.9                 | 1.11    | 701.4 |

**Table S4:** Experimental data from<sup>10</sup> showing 71 different starting composition of H<sub>2</sub>O, NaOH, and CaCO<sub>3</sub> along with the conversion efficiency.

| ID | H <sub>2</sub> O (g) | NaOH (g) | CaCO <sub>3</sub> (g) | H <sub>2</sub> O (wt.%) | NaOH (wt.%) | CaCO <sub>3</sub> (wt.%) | Conversion (%) |
|----|----------------------|----------|-----------------------|-------------------------|-------------|--------------------------|----------------|
| 1  | 67.53                | 46.05    | 10.03                 | 54.6                    | 37.3        | 8.1                      | 96             |
| 2  | 63.02                | 56.04    | 10.02                 | 48.8                    | 43.4        | 7.8                      | 95.6           |
| 3  | 223.32               | 100.02   | 10                    | 67                      | 30          | 3                        | 93             |
| 4  | 135.03               | 92.17    | 10                    | 56.9                    | 38.9        | 4.2                      | 90.6           |
| 5  | 15.04                | 12.01    | 9.98                  | 40.6                    | 32.4        | 27                       | 86             |
| 6  | 10.03                | 10.03    | 10.06                 | 33.3                    | 33.3        | 33.4                     | 83.7           |
| 7  | 45.04                | 36.08    | 10.06                 | 49.4                    | 39.6        | 11                       | 81.1           |
| 8  | 20.06                | 12.06    | 10                    | 47.6                    | 28.6        | 23.7                     | 78.7           |
| 9  | 20.08                | 19.98    | 9.89                  | 40.2                    | 40          | 19.8                     | 78.5           |
| 10 | 30.04                | 24.03    | 9.97                  | 46.9                    | 37.5        | 15.6                     | 78.1           |
| 11 | 60.03                | 30.07    | 10.08                 | 59.9                    | 30          | 10.1                     | 78.1           |
| 12 | 12.07                | 12.07    | 10                    | 35.4                    | 35.4        | 29.3                     | 77.7           |
| 13 | 15.04                | 10.05    | 9.98                  | 42.9                    | 28.7        | 28.5                     | 73.8           |
| 14 | 30.01                | 20.04    | 10                    | 50                      | 33.4        | 16.7                     | 70.6           |
| 15 | 40.04                | 25.04    | 10.06                 | 53.3                    | 33.3        | 13.4                     | 70             |
| 16 | 87.53                | 27.51    | 10.02                 | 70                      | 22          | 8                        | 69.3           |
| 17 | 25                   | 15.06    | 10.03                 | 49.9                    | 30.1        | 20                       | 69.2           |
| 18 | 20.06                | 14.98    | 10.08                 | 44.5                    | 33.2        | 22.3                     | 69.1           |
| 19 | 8.02                 | 8.06     | 10.02                 | 30.7                    | 30.9        | 38.4                     | 69             |
| 20 | 15.05                | 15.01    | 9.99                  | 37.6                    | 37.5        | 24.9                     | 67.8           |
| 21 | 40                   | 20.01    | 9.97                  | 57.2                    | 28.6        | 14.2                     | 67.4           |
| 22 | 13.5                 | 11.99    | 10.03                 | 38                      | 33.8        | 28.2                     | 66.3           |
| 23 | 12.09                | 9.99     | 9.97                  | 37.7                    | 31.2        | 31.1                     | 62.8           |
| 24 | 7.03                 | 8.03     | 10.02                 | 28                      | 32          | 40                       | 61.4           |
| 25 | 14.06                | 12.98    | 9.99                  | 38                      | 35.1        | 27                       | 59.6           |
| 26 | 10.02                | 8.05     | 10.03                 | 35.7                    | 28.6        | 35.7                     | 58.5           |
| 27 | 10.05                | 12       | 10.02                 | 31.3                    | 37.4        | 31.2                     | 57.6           |
| 28 | 30.02                | 15.04    | 10.01                 | 54.5                    | 27.3        | 18.2                     | 55.2           |
| 29 | 8.06                 | 10.07    | 10.07                 | 28.6                    | 35.7        | 35.7                     | 53.3           |
| 30 | 15.03                | 8.01     | 9.98                  | 45.5                    | 24.3        | 30.2                     | 52.5           |
| 31 | 20.02                | 13.02    | 10.04                 | 46.5                    | 30.2        | 23.3                     | 52.2           |
| 32 | 15.09                | 11.06    | 10.04                 | 41.7                    | 30.6        | 27.7                     | 51.9           |
| 33 | 12.02                | 8.08     | 10.03                 | 39.9                    | 26.8        | 33.3                     | 51.9           |
| 34 | 9.98                 | 11.44    | 10                    | 31.8                    | 36.4        | 31.8                     | 51.1           |
| 35 | 15.02                | 20.06    | 10.01                 | 33.3                    | 44.5        | 22.2                     | 48.5           |
| 36 | 25.01                | 13       | 10.05                 | 52                      | 27          | 20.9                     | 47.4           |
| 37 | 25.01                | 11.99    | 12.03                 | 51                      | 24.5        | 24.5                     | 46.1           |
| 38 | 15.04                | 13.09    | 10.02                 | 39.4                    | 34.3        | 26.3                     | 45.9           |
| 39 | 50.03                | 64.99    | 10                    | 40                      | 52          | 8                        | 45.4           |
| 40 | 30.06                | 11.99    | 10                    | 57.8                    | 23          | 19.2                     | 41.7           |
| 41 | 20                   | 11.04    | 10.05                 | 48.7                    | 26.9        | 24.5                     | 40.8           |
| 42 | 40.16                | 15.05    | 10.04                 | 61.5                    | 23.1        | 15.4                     | 39.4           |
| 43 | 26.05                | 13.02    | 10.02                 | 53.1                    | 26.5        | 20.4                     | 38.2           |
| 44 | 7.02                 | 10.07    | 10.02                 | 25.9                    | 37.1        | 37                       | 31.9           |
| 45 | 20.01                | 8.05     | 10.02                 | 52.5                    | 21.1        | 26.3                     | 31.9           |
| 46 | 5.02                 | 12.06    | 10.02                 | 18.5                    | 44.5        | 37                       | 31.8           |
| 47 | 12.05                | 15.05    | 10.09                 | 32.4                    | 40.5        | 27.1                     | 30.1           |
| 48 | 40.05                | 12.08    | 10.07                 | 64.4                    | 19.4        | 16.2                     | 29.4           |
| 49 | 50.02                | 15.03    | 10.07                 | 66.6                    | 20          | 13.4                     | 28.7           |
| 50 | 10.03                | 15       | 10.01                 | 28.6                    | 42.8        | 28.6                     | 28.5           |
| 51 | 21.35                | 35.33    | 10.03                 | 32                      | 53          | 15                       | 27.7           |
| 52 | 10.04                | 15       | 12.09                 | 27                      | 40.4        | 32.6                     | 26.7           |
| 53 | 6.06                 | 14.98    | 10                    | 19.5                    | 48.3        | 32.2                     | 26.3           |

|    |       |       |       |      |      |      |      |
|----|-------|-------|-------|------|------|------|------|
| 54 | 25.05 | 8.04  | 10.14 | 57.9 | 18.6 | 23.5 | 21.1 |
| 55 | 13.51 | 15.98 | 9.98  | 34.2 | 40.5 | 25.3 | 20.7 |
| 56 | 50    | 12.03 | 9.99  | 69.4 | 16.7 | 13.9 | 19.8 |
| 57 | 30.02 | 10.03 | 10.04 | 59.9 | 20   | 20   | 19.7 |
| 58 | 5.02  | 10.05 | 10.01 | 20   | 40.1 | 39.9 | 16.5 |
| 59 | 30.01 | 8.04  | 9.99  | 62.5 | 16.7 | 20.8 | 16.1 |
| 60 | 10.06 | 16.95 | 10.03 | 27.2 | 45.8 | 27.1 | 15.4 |
| 61 | 8.04  | 15.04 | 9.99  | 24.3 | 45.5 | 30.2 | 13.5 |
| 62 | 4.03  | 12.06 | 10.02 | 15.4 | 46.2 | 38.4 | 12.3 |
| 63 | 40.04 | 10.06 | 10.03 | 66.6 | 16.7 | 16.7 | 12.1 |
| 64 | 5.06  | 8.03  | 10.04 | 21.9 | 34.7 | 43.4 | 12   |
| 65 | 7.07  | 11.99 | 9.98  | 24.3 | 41.3 | 34.4 | 11.1 |
| 66 | 4.1   | 15.02 | 10.01 | 14.1 | 51.6 | 34.4 | 11.1 |
| 67 | 4.03  | 9.96  | 10.05 | 16.8 | 41.4 | 41.8 | 10   |
| 68 | 40    | 8     | 9.99  | 69   | 13.8 | 17.2 | 7.5  |
| 69 | 50.03 | 10.03 | 10.05 | 71.4 | 14.3 | 14.3 | 7.3  |
| 70 | 10.12 | 19    | 10.03 | 25.8 | 48.5 | 25.6 | 7.2  |
| 71 | 50    | 7.99  | 10    | 73.5 | 11.8 | 14.7 | 3.5  |



## 5. Supplementary Figures

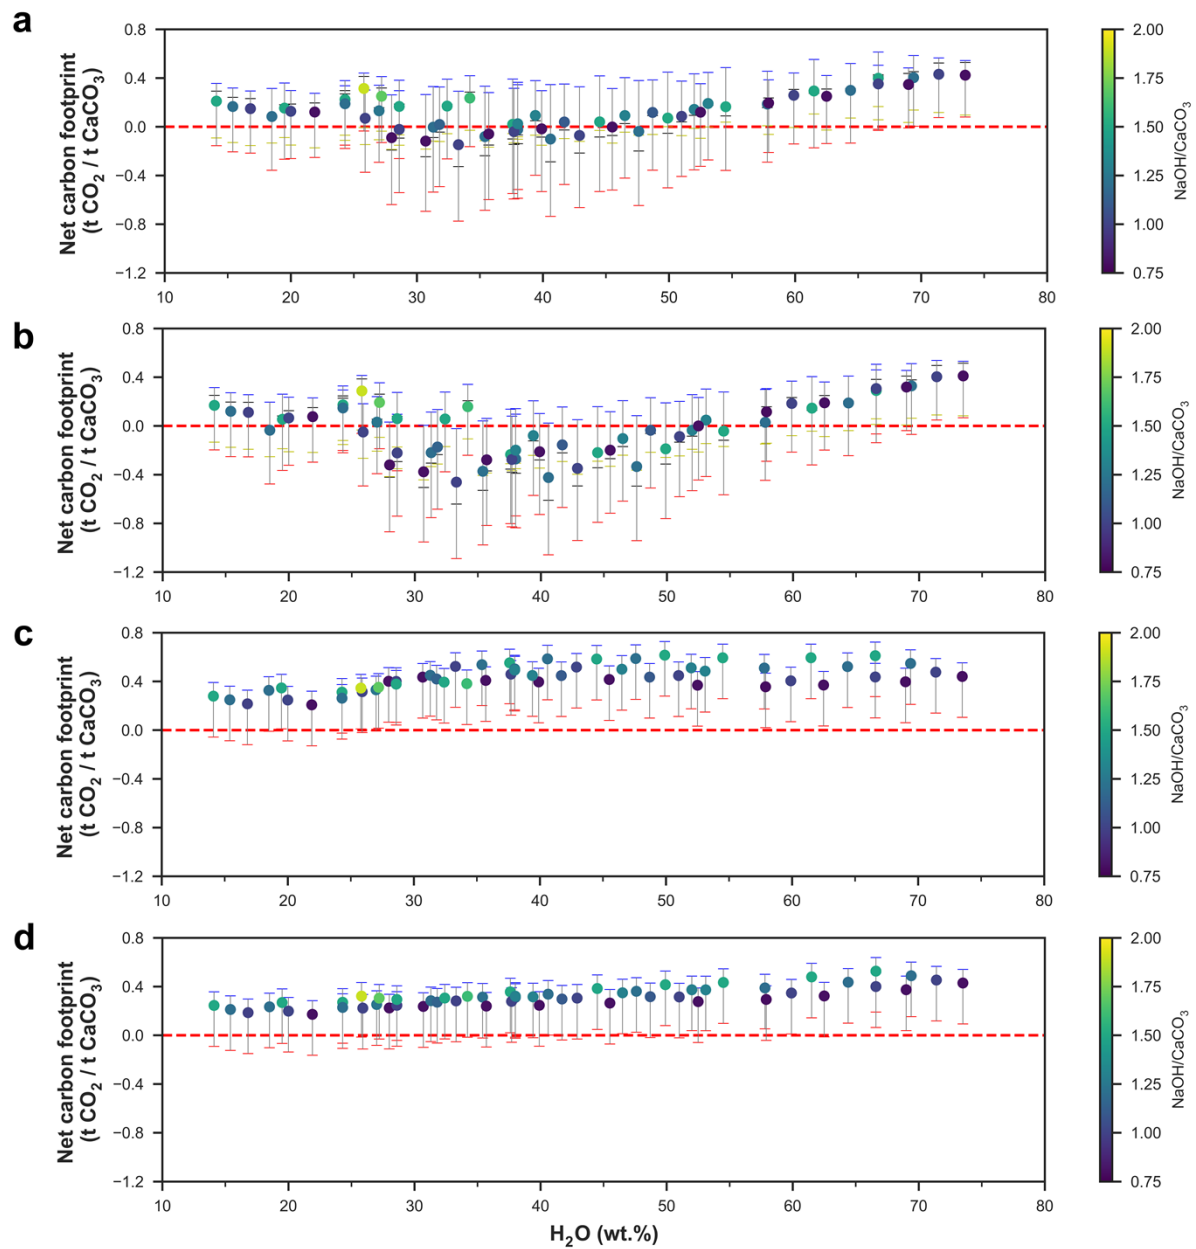

**Figure S2: Net carbon footprint of process A expressed in  $t\ CO_2$  per  $t\ CaCO_3$  processed compared to current  $CaO$  and  $Na_2CO_3$  production scenarios.** The four materials cases are plotted in (a) commercial  $NaOH$  and commercialised  $Na_2CO_3$ , (b) renewable  $NaOH$  and commercialised  $Na_2CO_3$ , (c) commercial  $NaOH$  and recycled  $Na_2CO_3$ , and (d) renewable  $NaOH$  and recycled  $Na_2CO_3$ . The solid circles show representative net carbon footprint. The coloured dashes on the error bar represent the following types of carbon footprint used while calculating the net carbon footprint: both  $NaOH$  and  $Na_2CO_3$  minimum carbon footprint – blue, both  $NaOH$  and  $Na_2CO_3$  maximum carbon footprint – red,  $NaOH$  minimum and  $Na_2CO_3$  maximum carbon footprint – black, and finally,  $NaOH$  maximum and  $Na_2CO_3$  minimum carbon footprint – yellow. The colour of the points in all the figures represents the  $NaOH$  and  $CaCO_3$  ratio in the mix design, as shown in the colour bar.

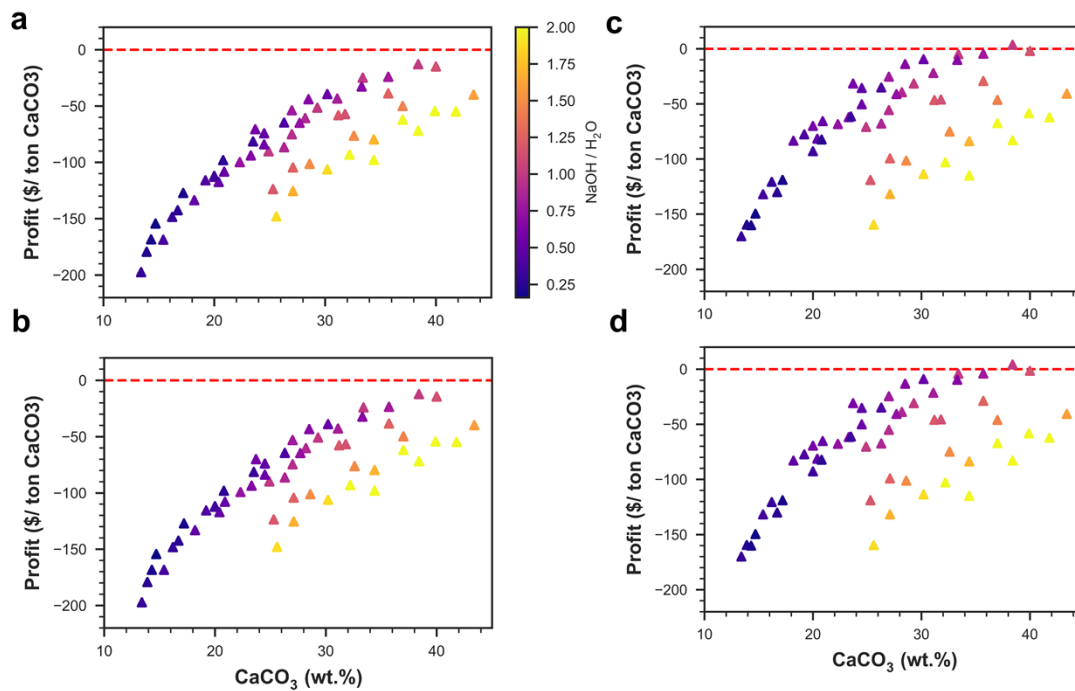

**Figure S3:** Profitability of the anion exchange process for different mix designs. Process A was not profitable for both cases (a) commercial NaOH and commercialised Na<sub>2</sub>CO<sub>3</sub>, (b) renewable NaOH and commercialised Na<sub>2</sub>CO<sub>3</sub>. Process B turned a small profit for both cases (c) commercial NaOH and commercialised Na<sub>2</sub>CO<sub>3</sub>, (d) renewable NaOH and commercialised Na<sub>2</sub>CO<sub>3</sub>.

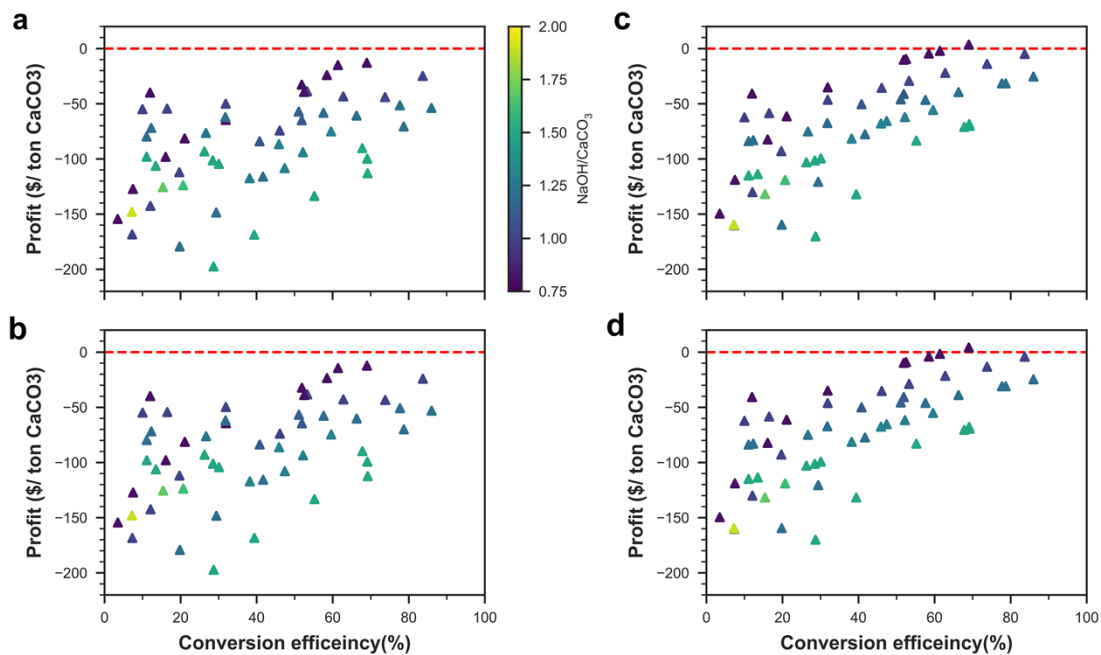

**Figure S4:** Profitability of the anion exchange process vs. conversion efficiency. Process A was not profitable for both cases (a) commercial NaOH and commercialised Na<sub>2</sub>CO<sub>3</sub>, (b) renewable NaOH and commercialised Na<sub>2</sub>CO<sub>3</sub>. Process B turned a small profit for both cases (c) commercial NaOH and commercialised Na<sub>2</sub>CO<sub>3</sub>, (d) renewable NaOH and commercialised Na<sub>2</sub>CO<sub>3</sub>.

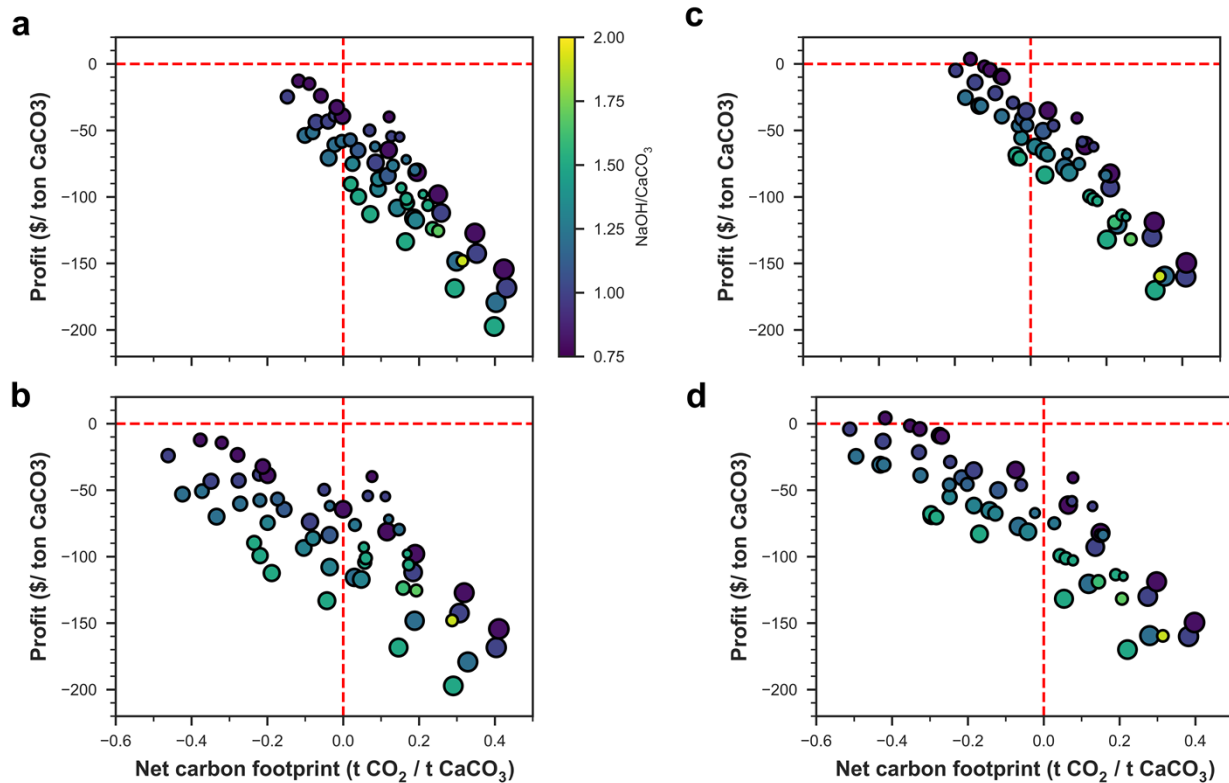

**Figure S5: Profitability vs net carbon footprint of the anion exchange process.** Process A - (a) commercial NaOH and commercialised  $\text{Na}_2\text{CO}_3$ , (b) renewable NaOH and commercialised  $\text{Na}_2\text{CO}_3$ . Process B - (c) commercial NaOH and commercialised  $\text{Na}_2\text{CO}_3$ , and (d) renewable NaOH and commercialised  $\text{Na}_2\text{CO}_3$ . The colour of the scatter plot depends on the NaOH to  $\text{CaCO}_3$  ratio in the mix design, whereas the sizes of the scatter points are proportional to the water content in the mix design.

## 6. References

- 1 Ardente, F. & Cellura, M. Economic allocation in life cycle assessment: the state of the art and discussion of examples. *Journal of Industrial Ecology* **16**, 387-398 (2012).
- 2 European, C. *et al. Towards net-zero emissions in the EU energy system by 2050 – Insights from scenarios in line with the 2030 and 2050 ambitions of the European Green Deal.* (Publications Office, 2020).
- 3 Eurochlor. Chlor-alkali Industry Review 2017/2018. (2019).
- 4 von der Assen, N., Voll, P., Peters, M. & Bardow, A. Life cycle assessment of CO<sub>2</sub> capture and utilization: a tutorial review. *Chemical Society Reviews* **43**, 7982-7994 (2014). <https://doi.org/10.1039/C3CS60373C>
- 5 Keith, D. W., Holmes, G., Angelo, D. S. & Heidel, K. A process for capturing CO<sub>2</sub> from the atmosphere. *Joule* **2**, 1573-1594 (2018).
- 6 Derek Pletcher, J. D. G., Norman L. Weinberg, Ella F. Spiegel. Methods for producing caustic soda without chlorine. (1991).
- 7 Medina-Martos, E. *et al.* Environmental and economic performance of carbon capture with sodium hydroxide. *Journal of CO<sub>2</sub> Utilization* **60**, 101991 (2022). <https://doi.org/https://doi.org/10.1016/j.jcou.2022.101991>
- 8 Shu, Q., Legrand, L., Kuntke, P., Tedesco, M. & Hamelers, H. V. M. Electrochemical regeneration of spent alkaline absorbent from direct air capture. *Environmental science & technology* **54**, 8990-8998 (2020).
- 9 Smith, E. E. *The Cost of CO<sub>2</sub> Transport and Storage in Global Integrated Assessment Modeling* MS thesis, MIT, (2021).
- 10 Hanein, T., Simoni, M., Woo, C. L., Provis, J. L. & Kinoshita, H. Decarbonisation of calcium carbonate at atmospheric temperatures and pressures, with simultaneous CO<sub>2</sub> capture, through production of sodium carbonate. *Energy & Environmental Science* **14**, 6595-6604 (2021).
